# Supplementary material for: Low-Cost Cellulase-Hemicellulase Mixture Secreted by Trichoderma harzianum EM0925 with Complete Saccharification Efficacy of Lignocellulose
Source: PubMed Central journal article supplement (PMC7014229; doi:10.3390/ijms21020371), 2020-01-07
Supplement: ijms-21-00371-s001.pdf [file ijms-21-00371-s001.pdf]

## Supplementary Materials:

**Table S1.** A comparison of different previous reported enzyme cocktails for lignocellulose saccharification.

| Enzyme Cocktails                              | Substrate/Pretreatment         | Enzyme Loading | Time | Saccharification Yield     | Reference              |
|-----------------------------------------------|--------------------------------|----------------|------|----------------------------|------------------------|
| Spezyme CP                                    | Switchgrass Ball-milled        | 26 mg/g        | 72 h | 100% glucose               | Boussaid et al., [29]  |
| Spezyme CP+Novozyme                           | Switchgrass Ionic liquid       | 109 mg/g       | 24 h | 91% glucose                | Li et al., [30]        |
| Cellic CTec 2                                 | Wheat straw Hot water          | 27 mg/g        | 96 h | 95% glucose                | Herbaut et al., [31]   |
| Cellic CTec 2                                 | Wheat straw Ionic liquid       | 27 mg/g        | 96 h | 45% glucose                | Herbaut et al., [31]   |
| Cellic CTec 3                                 | Spruce Sodium sulfite          | 10.5 mg/g      | 48 h | 76% glucose                | Chylenski et al., [32] |
| Celluclast 1.5L                               | Corn stover Ultrafine grinding | 10 mg/g        | 72 h | 49.6% glucose              | Li et al., [33]        |
| Spezyme CP+Novozyme<br>188+xylanase+pectinase | Prairie NaOH                   | 25 mg/g        | 72 h | 74% glucose 78% xylose     | Sills et al., [34]     |
| Celluclast 1.5L                               | Corn stover NaOH               | 15 mg/g        | 72 h | 85.6% glucose 66.2% xylose | This study             |
| EM0925                                        | Corn stover NaOH               | 10.8 mg/g      | 72 h | 100% glucose 100% xylose   | This study             |
| EM0925                                        | Corn stover Ultrafine grinding | 10.8 mg/g      | 72 h | 100% glucose 100% xylose   | This study             |

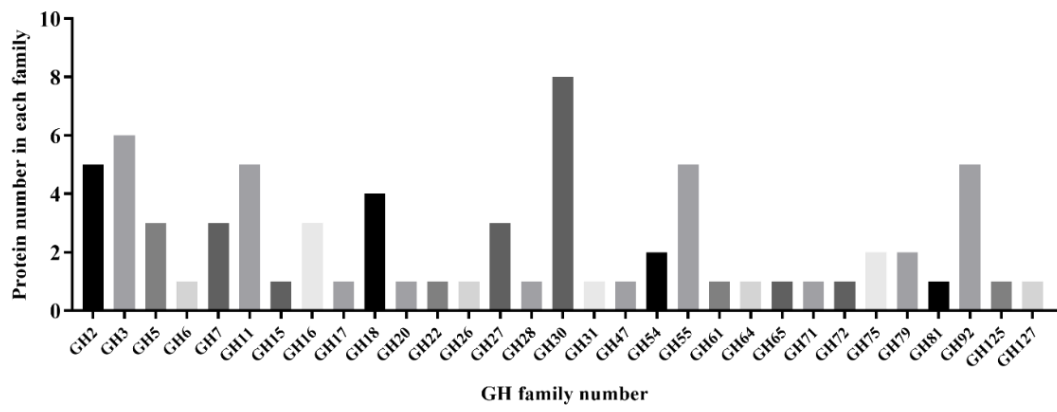

**Figure S1.** Distribution of glycoside hydrolase family in proteome of *T. harzianum* EM0925.
